# Supplementary material for: Puncture-to-Reperfusion Time Threshold Guides Procedural Termination in Thrombectomy: Analysis from the ANGEL-ACT Registry
Source: Research Square preprint supplement (doi:10.21203/rs.3.rs-6332896/v1), 2025-05-13
Supplement: Supplementary file 1 [file 06337e45b44c57ac5ab5a0d1.docx]

**Supplementary Fig.1 Relationship between onset-to-reperfusion time and favorable outcome**


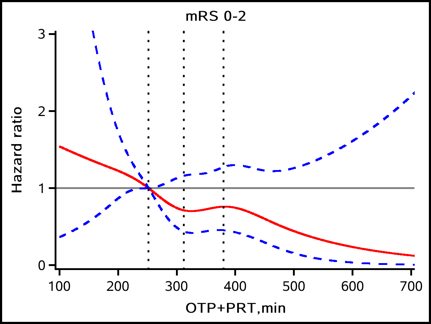


**Supplementary table 1.** **Subgroup analysis of prolonged PRT for 90-day favorable outcome after PRT was dichotomized at 51 minutes**

|  | **No. of patients** | **aOR (95% CI)** | **P for interaction** |
| --- | --- | --- | --- |
| **Age** |  |  |  |
| <65 | 117 | 1.01(0.48-2.12) | 0.43 |
| >=65 | 103 | 1.04(0.57-1.90) |
| **Intravenous thrombolysis** |  |  |  |
| Yes | 81 | 1.32(0.61-2.86) | 0.64 |
| No | 139 | 0.97(0.55-1.73) |
| **Baseline NIHSS score** |  |  |  |
| <=15 | 120 | 0.86(0.45-1.67) | 0.57 |
| >15 | 99 | 1.15(0.62-2.16) |
| **Baseline ASPECT score** |  |  |  |
| <8 | 38 | 1.16(0.37-3.69) | 0.91 |
| ≥8 | 182 | 1.01(0.61-1.67) |
| **Tandem lesions** |  |  |  |
| Yes | 53 | 0.83(0.23-2.95) | 0.67 |
| No | 167 | 1.19(0.72-1.97) |
| **Anesthesia** |  |  |  |
| Local anesthesia | 149 | 0.99(0.58-1.69) | 0.06 |
| General anesthesia | 71 | 1.78(0.66-4.80) |

PRT, puncture-to-reperfusion time; OR, odds ratios; ASPECT, Alberta Stroke Program Early CT Score; NIHSS, National Institutes of Health Stroke Scale score.

† Successful reperfusion indicates modified Thrombolysis in Cerebral Infarction 2b-3.

**Supplementary table 2. Subgroup analysis of prolonged onset-to-reperfusion for 90-day favorable outcome after the onset-to-reperfusion time was dichotomized at 252 minutes**

|  | **No. of patients** | **aOR (95% CI)** | **P for interaction** |
| --- | --- | --- | --- |
| **Age** |  |  |  |
| <65 | 106 | 0.42(0.19-0.92) | 0.069 |
| >=65 | 104 | 0.83(0.45-1.53) |
| **Intravenous thrombolysis** |  |  |  |
| Yes | 83 | 0.41(0.17-1.00) | 0.57 |
| No | 127 | 0.80(0.46-1.38) |
| **Baseline NIHSS score** |  |  |  |
| <=15 | 122 | 0.91(0.46-1.81) | 0.40 |
| >15 | 87 | 0.54(0.29-1.01) |
| **Baseline ASPECT score** |  |  |  |
| <8 | 43 | 1.75(0.48-6.45) | 0.33 |
| ≥8 | 167 | 0.58(0.35-0.96) |
| **Tandem lesions** |  |  |  |
| Yes | 47 | 0.97(0.41-2.28) | 0.51 |
| No | 163 | 0.74(0.45-1.24) |
| **Anesthesia** |  |  |  |
| Local anesthesia | 151 | 0.66(0.38-1.13) | 0.18 |
| General anesthesia | 59 | 0.83(0.32-2.12) |

OR, odds ratios; ASPECT, Alberta Stroke Program Early CT Score; NIHSS, National Institutes of Health Stroke Scale score.

† Successful reperfusion indicates modified Thrombolysis in Cerebral Infarction 2b-3.
